# Supplementary material for: Predicting peptides binding to MHC class II molecules using multi-objective evolutionary algorithms
Source: Springer Nature journal article supplement (doi:10.1186/1471-2105-8-459), 2007-11-22

Figure 1: illustrates the motif logo derived from the alignment obtained by the MOEA motif guided by the experimental motifs.

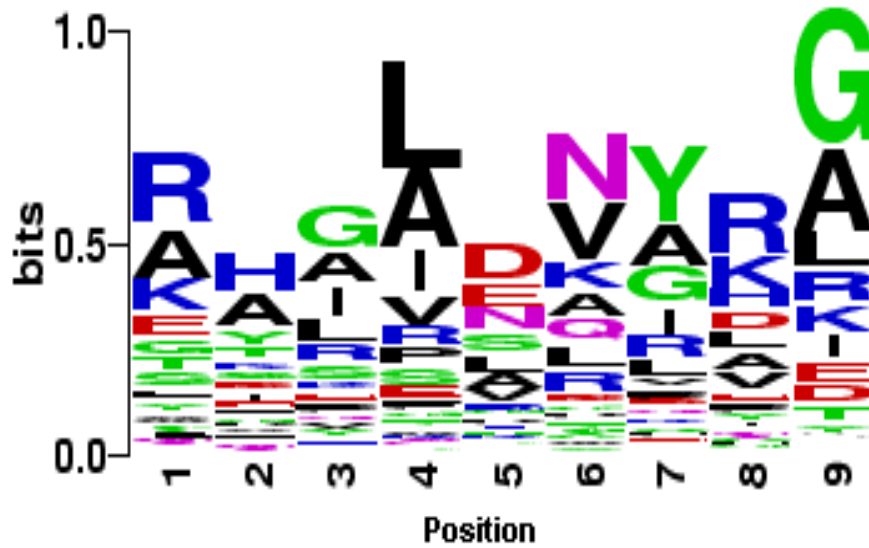

Figure 2: illustrates the motif logo derived from the alignment obtained by the self-discovered MOEA motif.

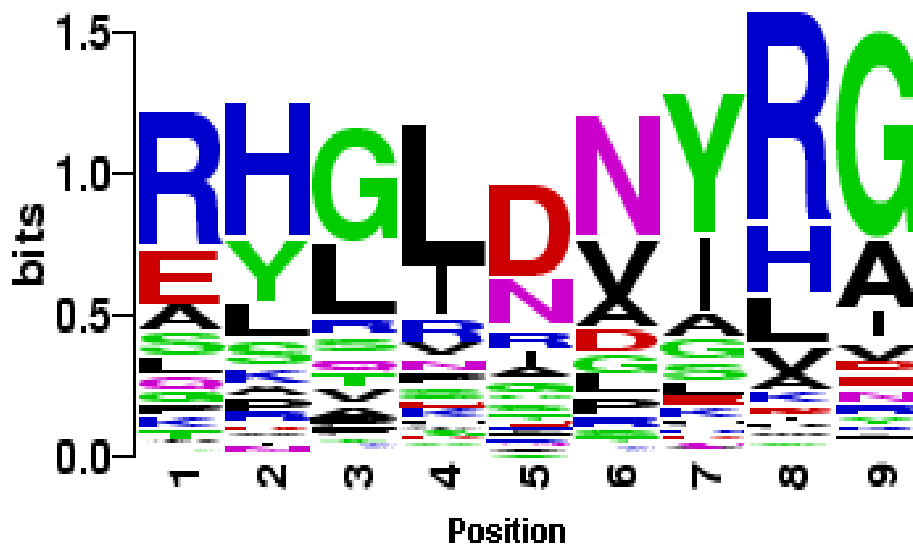

Supplement: Additional file 2 [file 1471-2105-8-459-s2.pdf]
